# Supplementary material for: Salmonella nomenclature in the genomic era: a time for change
Source: PubMed Central journal article supplement (PMC8021552; doi:10.1038/s41598-021-86243-w), 2021-04-05
Supplement: 41598_2021_86243_MOESM6_ESM.pdf [file 41598_2021_86243_MOESM6_ESM.pdf]

ST241

Serotyped as Bredeneý

Serotyped as Schwarzengrund

Reference

Schwarzengrund

Bredeneý

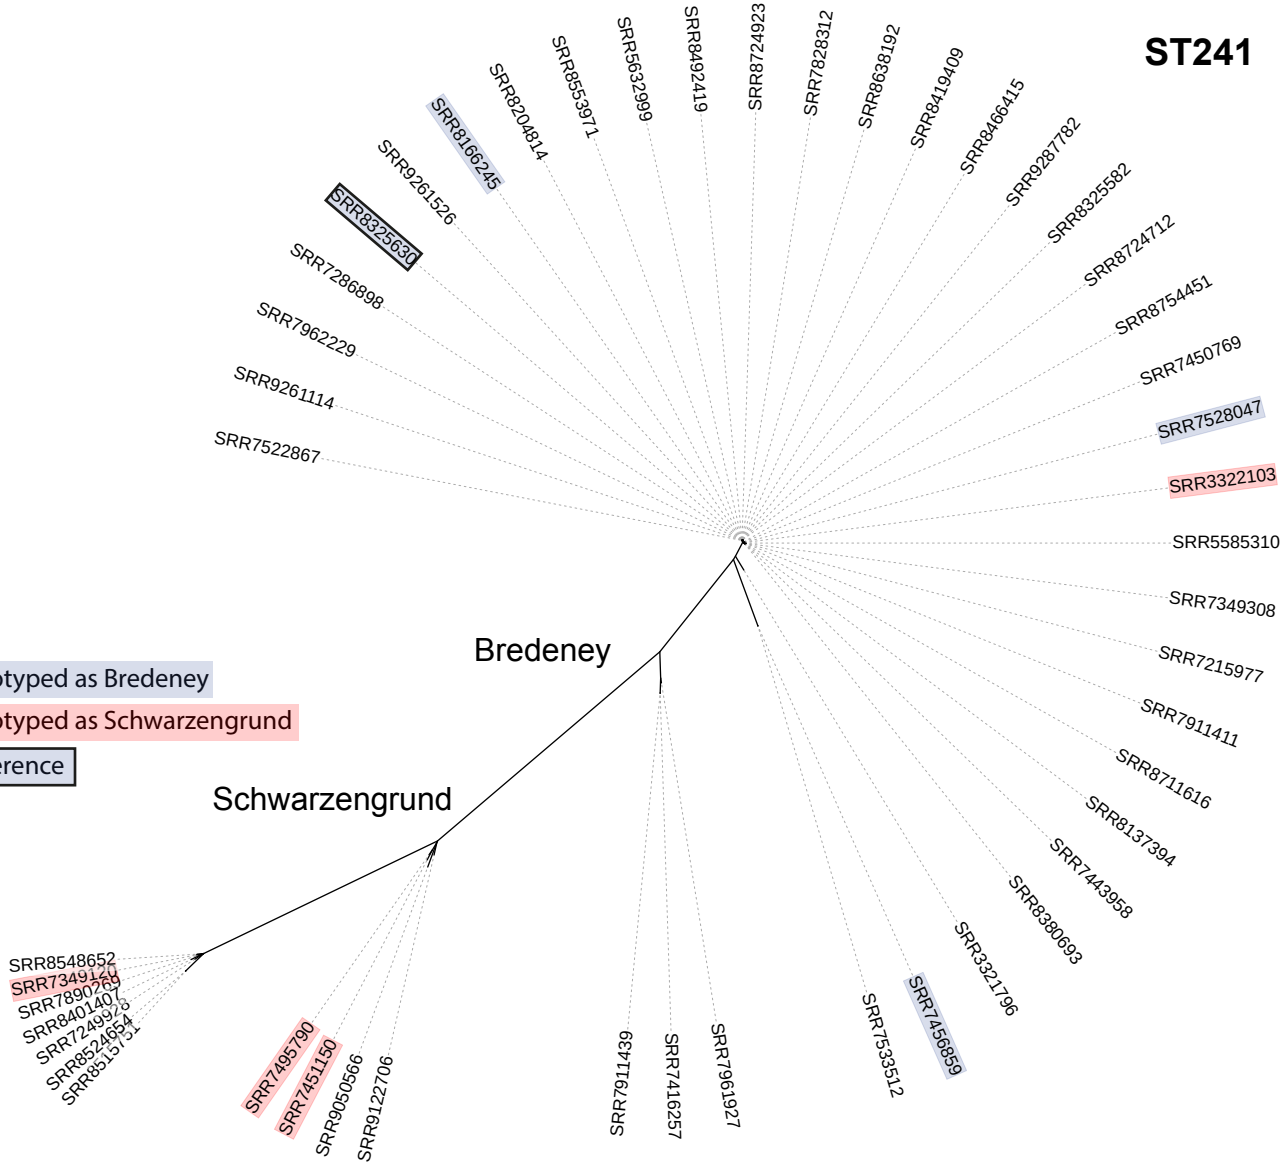

Tree scale: 0.1
